# Supplementary material
Source: publisher figshare collection journal article supplement (https://karger.figshare.com/ndownloader/files/38271300)
Supplement: Supplementary file 1 [file 38271300]

**CLINICAL CENTERS Baylor College of Medicine:** S. McKay*, B. Anderson, F. Bacha, S. Gunn, M. Haymond, N. Miranda, S. Seributra, R. Zagado **Case Western Reserve University:** R. Gubitosi-Klug* (Steering Committee Vice-Chair), S. Narasimhan*, T. Casey, R. Farrell, K. Kutney, S. Macleish, P. McGuigan **Children’s Hospital Los Angeles:** M. Geffner*, N. Chang, L. Chao, J. Quach, L. Fisher, V. Guzman **Children's Hospital of Philadelphia:** L. Levitt Katz*, C. Carchidi, G. McGinley, B. Schwartzman, R. Shah, S. Willi **Children's Hospital of Pittsburgh:** S. Arslanian*, K. Brown, S. Cochenour, A. Flint, N. Guerra, K. Hughan, I. Libman, M. Marcus, K. Porter **Columbia University Medical Center:** R. Goland*, R. Gandica, K. Gumpel, C. Hausheer, P. Kringas, J. Pring **Joslin Diabetes Center:** L. Laffel*, L. Higgins, E. Isganaitis, J. Keady, M. Malloy, K. Milaszewski **Massachusetts General Hospital:** D.M. Nathan*, D. Koren, L. Levitsky, K. Martin, B. Steiner **Saint Louis University:** S. Tollefsen*, T. Cattoor, D. Dempsher, J. Meyer, K. Schopp, M. Siska, B. Wolff **State University of New York Upstate Medical University:** R. Weinstock*, S. Bzdick, P. Conboy **University of Colorado Denver:** P. Zeitler* (Steering Committee Chair), N. Abramson, P. Bjornstad, C. Chan, J. Higgins, C. Hovater, M.M. Kelsey, K. Nadeau, C. Retamal-Munoz, K. Vissat **Oklahoma Health Sciences Center:** J. Tryggestad*, S. Chernausek*, K. Copeland* (retired), J. Chadwick, J. Less, C. Macha, J. Preske **University of Texas Health Science Center at San Antonio:** J. Lynch*, R. Barajas, E. Escaname, D. Hale, C. Orsi, M. Rayas, A. Wauters, D. Word **Washington University in St Louis:** N. White*, J. Jones, T. Jones, T. Stich **Yale University:** S. Caprio*, C. Guandalini, P. Rose, M. Van Name

**COORDINATING CENTER George Washington University Biostatistics Center:** K. Drews*, B. Braffett, B. Burke, K. Cross, L. El ghormli, J. George, N. Grover, M. Gunaratne, A. Lauer, K. Tan, B. Tesfaldet, M. Tung, M. Turney, D. Uschner, S. Zhou

**PROJECT OFFICE National Institute of Diabetes and Digestive and Kidney Diseases:** B. Linder*

**CENTRAL UNITS Central Blood Laboratory (Northwest Lipid Research Laboratories, University of Washington):** S.M. Marcovina*, J. Albers, J. Harting, P. Parbhakar, J. Ramirez, M. Ramirez, G. Strylewicz **Echocardiogram Reading Center (Johns Hopkins University):** J. Lima*, H. Doria de Vasconellos, S Gidding, K. Keck, J. Ortman, J. Puccella **Fundus Photography Reading Center (University of Wisconsin):** B. Blodi*, M. Mititelu*, A. Domalpally **Pulse Wave Velocity Reading Center (Cincinnati Children's Hospital Medical Center):** E. Urbina*, A. Shah **Sleep Reading Center (University of Chicago):** B. Mokhlesi*, H. Whitmore
